# Supplementary material for: Trends in Insulin Types and Devices Used by Adults With Type 2 Diabetes in the United States, 2016 to 2020
Source: PubMed Central journal article supplement (PMC8511976; doi:10.1001/jamanetworkopen.2021.28782), 2021-10-12
Supplement: jamanetwopen-e2128782-s001.pdf [file jamanetwopen-e2128782-s001.pdf]

## Supplemental Online Content

Sarkar S, Heyward J, Alexander GC, Kalyani RR. Trends in insulin types and devices used by adults with type 2 diabetes in the United States, 2016 to 2020. *JAMA Netw Open*. 2021;4(10):e2128782.  
doi:10.1001/jamanetworkopen.2021.28782

**eAppendix.** List of Specific Insulin Products Included in IQVIA National Disease and Therapeutic Index, 2016-2020

**eTable.** Insulin Products and Devices Approved by the US Food and Drug Administration and Available in the United States, 2016-2020

This supplemental material has been provided by the authors to give readers additional information about their work.

**eAppendix.** List of Specific Insulin Products Included in IQVIA National Disease and Therapeutic Index, 2016-2020

Insulin molecules

These included the following:

- insulin aspart (Fiasp, Fiasp Flextouch, Novolog, Novolog Flexpen)
- insulin degludec (Tresiba, Xultophy)
- insulin detemir (Levemir, Levemir Flextouch)
- insulin glargine (Basaglar Kwikpen, Lantus, Lantus Solostar, Semglee, Soliqua, Toujeo MaxSolostar, Toujeo Solostar)
- insulin glulisine (Apidra, Apidra Solostar)
- insulin lispro (Admelog, Admelog Solostar, Humalog, Humalog Jr Kwikpen, Humalog Kwikpen, Insulin Lispro, Insulin Lispro Kwikpen)\*
- NPH insulin (Humulin N, Humulin N Kwikpen, Novolin N)
- regular insulin (Afrezza, Humulin R, Humulin R Kwikpen, Novolin R)
- pre-mixed analog insulins (Humalog Mix 75/25, Humalog Mix 50/50, Humalog Kwikpen 50/50, Humalog Kwikpen 75/25, Novolog Flexpen Mix 70/30, Novolog Mix 70/30)
- pre-mixed human insulins (Humulin 70/30, Humulin 70/30 Kwikpen, Novolin 70/30, Novolin 70/30 Flexpen).

*\*Lyumjev was approved in mid-2020 but there were no treatment visits reported for that year.*

Insulin treatment classes

These included the following:

- Long-acting insulins included Basaglar Kwikpen, Lantus, Lantus Solostar, Levemir, Levemir Flextouch, Semglee, Soliqua, Toujeo MaxSolostar, Toujeo Solostar, Tresiba, and Xultophy.
- Intermediate-acting insulins included Humulin N, Humulin N Kwikpen, and Novolin N.

- Rapid-acting insulins included the following: Admelog, Admelog Solostar, Afrezza, Apidra, Apidra Solostar, Fiasp, Fiasp Flextouch, Humalog, Humalog Jr Kwikpen, Humalog Kwikpen, Insulin Lispro, Insulin Lispro Kwikpen, Novolog, and Novolog Flexpen.
- Short-acting insulins included Humulin R, Humulin R Kwikpen, and Novolin R.
- Pre-mixed insulins included Humalog Kwikpen 50/50, Humalog Kwikpen 75/25, Humalog Mix 50/50, Humalog Mix 75/25, Humulin 70/30, Humulin 70/30 Kwikpen, Novolin 70/30, Novolin 70/30 Flexpen, Novolog Flexpen Mix 70/30, and Novolog Mix 70/30.

### Insulin type

These included the following:

- Analog insulins included the following: Apidra, Apidra Solostar, Fiasp, Fiasp Flextouch, Humalog, Humalog Jr Kwikpen, Humalog Kwikpen, Humalog Kwikpen 50/50, Humalog Kwikpen 75/25, Humalog Mix 50/50, Humalog Mix 75/25, Insulin Lispro, Insulin Lispro Kwikpen, Lantus, Lantus Solostar, Levemir, Levemir Flextouch, Novolog, Novolog Flexpen, Novolog Flexpen Mix 70/30, Novolog Mix 70/30, Semglee, Soliqua, Toujeo MaxSolostar, Toujeo Solostar, Tresiba, Xultophy.
- Human insulins included the following: Afrezza, Humulin 70/30, Humulin 70/30 Kwikpen, Humulin N, Humulin N Kwikpen, Humulin R, Humulin R Kwikpen, Novolin 70/30, Novolin 70/30 FlexPen, Novolin N, and Novolin R.
- Biosimilar insulins included the following: Basaglar Kwikpen, Admelog, and Admelog Solostar.

### Insulin delivery devices

These included the following:

- Vials of insulin included the following: Admelog, Apidra, Fiasp, Humalog, Humalog Mix 50/50, Humalog Mix 75/25, Humulin 70/30, Humulin N, Humulin R, Insulin Lispro, Lantus, Levemir, Novolin 70/30, Novolin N, Novolin R, Novolog, Novolog Mix 70/30, Semglee, and Tresiba.
- Insulin pens included the following: Admelog Solostar, Apidra Solostar, Basaglar Kwikpen, Fiasp Flextouch, Humalog Jr Kwikpen, Humalog Kwikpen, Humalog Kwikpen 50/50, Humalog Kwikpen 75/25, Humulin 70/30 Kwikpen, Humulin N Kwikpen, Humulin R Kwikpen, Lantus Solostar, Levemir Flextouch, Novolog Flexpen, Novolin 70/30 Flexpen, Novolog Flexpen Mix 70/30, Semglee, Soliqua, Toujeo MaxSolostar, Toujeo Solostar, and Xultophy.
- Inhaled insulin included Afrezza.

#### *Older versus newer insulins*

These included the following:

- Newer insulins included those approved by the FDA in 2010 to the present (Admelog, Admelog Solostar, Afrezza, Basaglar Kwikpen, Fiasp, Fiasp Flextouch, Humalog Jr Kwikpen, Humulin 70/30 Kwikpen, Humulin N Kwikpen, Humulin R Kwikpen, Insulin Lispro, Insulin Lispro Kwikpen, Levemir Flextouch, Novolin 70/30 Flexpen, Semglee, Soliqua, Toujeo MaxSolostar, Toujeo Solostar, Tresiba, and Xultophy).
- Older insulins included those approved by the FDA prior to 2010 (Apidra, Apidra Solostar, Humalog, Humalog Kwikpen, Humalog Kwikpen 50/50, Humalog Kwikpen 75/25, Humalog Mix 50/50, Humalog Mix 75/25, Humulin 70/30, Humulin N, Humulin R, Lantus Solostar, Lantus, Levemir, Novolin 70/30, Novolin N, Novolin R, Novolog, Novolog Flexpen, Novolog Flexpen Mix 70/30, and Novolog Mix 70/30).

*Fixed-dose combination insulins*

Combination basal and insulin-glucagon-like related peptide agents included the following:

- Soliqua (insulin glargine and lixisenatide)
- Xultophy (insulin degludec and liraglutide).

**eTable.** Insulin Products and Devices Approved by the US Food and Drug Administration and Available in the United States, 2016-2020

| <b>Insulin Molecule<br/>(Year of<br/>Approval)</b>                    | <b>Drug Brand Names</b>                                                                                           | <b>Insulin Delivery Devices (Pens)</b>                                                                          |
|-----------------------------------------------------------------------|-------------------------------------------------------------------------------------------------------------------|-----------------------------------------------------------------------------------------------------------------|
| <b><i>Isophane (NPH)<br/>insulin<br/>(1982)</i></b>                   | Humulin N <sup>®</sup> Novolin<br>N ReliOn <sup>®</sup><br>Novolin N <sup>®</sup>                                 | Humulin N Kwikpen U-100<br>Novolin N FlexPen U-100<br>Novolin N FlexPen ReliOn U-100                            |
| <b><i>Regular insulin<br/>(1982)</i></b>                              | Humulin R <sup>®</sup><br>Novolin N ReliOn <sup>®</sup><br>Novolin R <sup>®</sup><br>Humulin R U-500 <sup>®</sup> | Novolin R FlexPen U-100<br>Novolin R FlexPen ReliOn U-100<br>Humulin R Kwikpen U-100<br>Humulin R KwikPen U-500 |
| <b><i>70%<br/>(isophane)/30%<br/>(regular)<br/>(1989)</i></b>         | Humulin 70/30 <sup>®</sup><br>Novolin 70/30 <sup>®</sup>                                                          | Humulin 70/30 Kwikpen U-100<br>Novolin 70/30 FlexPen U-100<br>Novolin 70/30 FlexPen ReliOn U-100                |
| <b><i>Lispro<br/>(1996)</i></b>                                       | Humalog <sup>®</sup>                                                                                              | Humalog Kwikpen U-100<br>Humalog Kwikpen U-200<br>Humalog Jr Kwikpen U-100                                      |
| <b><i>50% (lispro<br/>protamine)/<br/>50% (lispro)<br/>(1999)</i></b> | Humalog Mix 50/50 <sup>®</sup>                                                                                    | Humalog Kwikpen 50/50 U-100                                                                                     |
| <b><i>75% (lispro<br/>protamine)/25%<br/>(lispro)<br/>(1999)</i></b>  | Humalog Mix 75/25 <sup>®</sup>                                                                                    | Humalog Kwikpen 75/25 U-100                                                                                     |
| <b><i>Aspart<br/>(2000)</i></b>                                       | Novolog <sup>®</sup>                                                                                              | Novolog Flexpen U-100                                                                                           |
| <b><i>Glargine<br/>(2000)</i></b>                                     | Lantus <sup>®</sup><br>Toujeo <sup>®</sup>                                                                        | Lantus Solostar U-100<br>Toujeo Solostar U-300<br>Toujeo Max Solostar U-300                                     |
| <b><i>70% (aspart<br/>protamine)/ 30%<br/>(aspart)<br/>(2001)</i></b> | Novolog 70/30 <sup>®</sup>                                                                                        | Novolog Flexpen Mix 70/30 U-100                                                                                 |
| <b><i>Glulisine<br/>(2004)</i></b>                                    | Apidra <sup>®</sup>                                                                                               | Apidra Solostar U-100                                                                                           |

|                                                                  |                       |                                                    |
|------------------------------------------------------------------|-----------------------|----------------------------------------------------|
| <b><i>Detemir<br/>(2005)</i></b>                                 | Levemir <sup>®</sup>  | Levemir Flextouch U-100                            |
| <b><i>Inhaled regular insulin<br/>(2014)</i></b>                 | Afrezza <sup>®</sup>  | Afrezza (inhaler)                                  |
| <b><i>Degludec<br/>(2015)</i></b>                                | Tresiba <sup>®</sup>  | Tresiba Flextouch U-100<br>Tresiba Flextouch U-200 |
| <b><i>Biosimilar glargine<br/>(2015)</i></b>                     | Basaglar <sup>®</sup> | Basaglar Kwikpen U-100                             |
| <b><i>Insulin glargine and lixisenatide<br/>(2016)</i></b>       | Soliqua <sup>®</sup>  | Soliqua <sup>®</sup>                               |
| <b><i>Insulin degludec and liraglutide<br/>(2016)</i></b>        | Xultophy <sup>®</sup> | Xultophy <sup>®</sup>                              |
| <b><i>Faster aspart<br/>(2017)</i></b>                           | Fiasp <sup>®</sup>    | Fiasp Flextouch U-100                              |
| <b><i>Biosimilar lispro<br/>(2017)</i></b>                       | Admelog <sup>®</sup>  | Admelog Solostar U-100                             |
| <b><i>Biosimilar and interchangeable glargine<br/>(2020)</i></b> | Semglee <sup>®</sup>  | Semglee U-100 pen                                  |
